# Supplementary material for: Fluorescence excitation and excited state intramolecular proton transfer of jet-cooled naphthol derivatives: part 2. 2-Hydroxy–1-naphthaldehyde
Source: Royal Society of Chemistry journal article supplement (doi:10.1039/c1cp22200g), 2011-01-01
Supplement: c1cp22200g.pdf [file c1cp22200g.pdf]

## Supplementary Material: 2-hydroxy-1-naphthaldehyde (2H1N)

### S1. $S_0$ geometry of 2H1N (*ab initio* calculations)

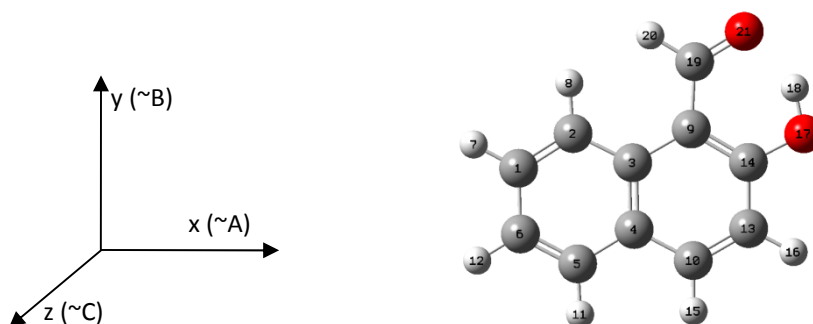

**Figure S1:** Gaussian calculation co-ordinate scheme. The orientations of the axes A, B, C (corresponding to the principle moments of inertia  $I_A$ ,  $I_B$ ,  $I_C$ ) are also shown. The  $z$  co-ordinate corresponds exactly with C. The  $y$  and  $x$  axes correspond approximately ( $\sim 99\%$  correspondence) with B and A, respectively.

**Table S1:** DFT B3LYP/6-31G\*\* optimised  $S_0$  geometry of 2H1N.

| Atom            | $x$      | $y$      | $z$       |
|-----------------|----------|----------|-----------|
| C <sub>1</sub>  | 0.000000 | 0.000000 | 0.000000  |
| C <sub>2</sub>  | 1.381346 | 0.000000 | 0.000000  |
| C <sub>3</sub>  | 2.116733 | 1.213028 | 0.000000  |
| C <sub>4</sub>  | 1.373254 | 2.435985 | 0.000000  |
| C <sub>5</sub>  | -0.04253 | 2.405012 | 0.000000  |
| C <sub>6</sub>  | -0.72571 | 1.208419 | 0.000000  |
| H <sub>7</sub>  | -0.53239 | -0.94667 | 0.000000  |
| H <sub>8</sub>  | 1.897653 | -0.95292 | 0.000000  |
| C <sub>9</sub>  | 3.562153 | 1.278857 | 0.000000  |
| C <sub>10</sub> | 2.076907 | 3.677427 | 0.000000  |
| H <sub>11</sub> | -0.58213 | 3.348504 | 0.000000  |
| H <sub>12</sub> | -1.81096 | 1.192781 | 0.000000  |
| C <sub>13</sub> | 3.442794 | 3.737953 | 0.000000  |
| C <sub>14</sub> | 4.203413 | 2.538088 | 0.000000  |
| H <sub>15</sub> | 1.49668  | 4.596674 | 0.000000  |
| H <sub>16</sub> | 3.979369 | 4.680236 | 0.000000  |
| O <sub>17</sub> | 5.529289 | 2.659272 | 0.000000  |
| H <sub>18</sub> | 5.898094 | 1.729123 | 0.000000  |
| C <sub>19</sub> | 4.400471 | 0.099672 | 0.000000  |
| H <sub>20</sub> | 3.906048 | -0.88446 | -0.000177 |
| O <sub>21</sub> | 5.642854 | 0.12616  | -0.000182 |

## S2. Ground State Vibrational Frequencies

Table S2 lists the DFT B3LYP 6-31G\*\* ground state vibrational frequencies of the optimised ground state geometry of 2H1N. All frequencies have been scaled by the recommended scale factor of 0.9611.<sup>54</sup> As 2H1N is an isomer of 1H2N, it exhibits the same number and type of vibrational modes as 1H2N, i.e. 39 modes of A' symmetry and 18 modes of A'' symmetry. In-plane modes (A' symmetry) are denoted by  $\nu'_\#$ , where # is the number assigned to the mode. Out-of-plane (A'' symmetry) modes are denoted by  $\nu''_\#$ . The modes are numbered in order of increasing frequency.

**Table S2:** Vibrational frequencies (DFT B3LYP/6-31G\*\*) of the ground state ( $S_0$ ) of 2H1N. The abbreviation naph.refers to the naphthalene rings of the 2H1N molecule i.e. the rings formed by the atoms  $C_1 - C_6$  (inclusive) and  $C_9, C_{10}, C_{13}$  and  $C_{14}$ . Vibrations modulating the  $O_{21}\dots H_{18}$  distance are described accordingly.

| Totally symmetric (A') modes: $S_0$ (DFT B3LYP/6-31G**) |                               |                                                            |                                                                                               |
|---------------------------------------------------------|-------------------------------|------------------------------------------------------------|-----------------------------------------------------------------------------------------------|
| Mode                                                    | $\nu'$<br>[cm <sup>-1</sup> ] | $\nu'_{\text{scaled}} = 0.9611\nu'$<br>[cm <sup>-1</sup> ] | Description                                                                                   |
| $\nu'_5$                                                | 252                           | 242                                                        | Naph. ring C-C angle bends; CHO wag;<br>strongly modulates $O_{21}\dots H_{18}$               |
| $\nu'_7$                                                | 352                           | 338                                                        | Naph. ring C-C angle bends; OH wag;<br>strongly modulates $O_{21}\dots H_{18}$                |
| $\nu'_9$                                                | 433                           | 416                                                        | Naph. ring C-C angle bends                                                                    |
| $\nu'_{10}$                                             | 441                           | 424                                                        | Naph. ring C-C angle bends<br>(symmetric naph. ring stretching)                               |
| $\nu'_{11}$                                             | 492                           | 473                                                        | Naph. ring C-C angle bends; C=O bend; OH wag;<br>strongly modulates $O_{21}\dots H_{18}$      |
| $\nu'_{13}$                                             | 543                           | 522                                                        | Naph. ring C-C angle bends; modulates $O_{21}\dots H_{18}$                                    |
| $\nu'_{15}$                                             | 669                           | 643                                                        | Naph. ring C-C angle bends (ring stretching);<br>modulates $O_{21}\dots H_{18}$               |
| $\nu'_{17}$                                             | 733                           | 704                                                        | C-C bond stretching; CH wags; $O_{17}\text{-}H_{18}$ wag;<br>modulates $O_{21}\dots H_{18}$ . |
| $\nu'_{20}$                                             | 782                           | 751                                                        | Naph. ring C-C angle bends; modulates $O_{21}\dots H_{18}$                                    |
| $\nu'_{22}$                                             | 875                           | 841                                                        | Naph. ring C-C angle bends                                                                    |
| $\nu'_{27}$                                             | 992                           | 953                                                        | Naph. ring C-C angle bends; modulates $O_{21}\dots H_{18}$                                    |
| $\nu'_{30}$                                             | 1066                          | 1025                                                       | Naph. ring breathing                                                                          |
| $\nu'_{31}$                                             | 1110                          | 1067                                                       | C-H wags; C-C angle bends; modulates $O_{21}\dots H_{18}$                                     |
| $\nu'_{32}$                                             | 1173                          | 1127                                                       | C-H wags                                                                                      |
| $\nu'_{33}$                                             | 1195                          | 1149                                                       | C-H wags                                                                                      |
| $\nu'_{34}$                                             | 1209                          | 1162                                                       | C-C bond stretching; CH wags; $O_{17}\text{-}H_{18}$ wag;<br>modulates $O_{21}\dots H_{18}$   |
| $\nu'_{35}$                                             | 1246                          | 1197                                                       | "                                                                                             |
| $\nu'_{36}$                                             | 1283                          | 1233                                                       | "                                                                                             |

|             |      |      |                                                                                                             |
|-------------|------|------|-------------------------------------------------------------------------------------------------------------|
| $\nu'_{37}$ | 1332 | 1280 | "                                                                                                           |
| $\nu'_{38}$ | 1361 | 1308 | "                                                                                                           |
| $\nu'_{39}$ | 1395 | 1341 | "                                                                                                           |
| $\nu'_{40}$ | 1410 | 1355 | "                                                                                                           |
| $\nu'_{41}$ | 1444 | 1388 | "                                                                                                           |
| $\nu'_{42}$ | 1477 | 1420 | "                                                                                                           |
| $\nu'_{43}$ | 1483 | 1425 | "                                                                                                           |
| $\nu'_{44}$ | 1523 | 1464 | "                                                                                                           |
| $\nu'_{45}$ | 1572 | 1510 | "                                                                                                           |
| $\nu'_{46}$ | 1639 | 1575 | "                                                                                                           |
| $\nu'_{47}$ | 1653 | 1589 | "                                                                                                           |
| $\nu'_{48}$ | 1674 | 1609 | "                                                                                                           |
| $\nu'_{49}$ | 1707 | 1641 | C=O (i.e. C <sub>19</sub> =O <sub>21</sub> ) bond stretching; modulates O <sub>21</sub> ..H <sub>18</sub> . |
| $\nu'_{50}$ | 3024 | 2906 | C <sub>19</sub> -H <sub>20</sub> stretch (aldehyde group)                                                   |
| $\nu'_{51}$ | 3144 | 3022 | OH stretch; strongly modulates O <sub>21</sub> ..H <sub>18</sub> .                                          |
| $\nu'_{52}$ | 3178 | 3054 | CH stretches (naphthalene ring)                                                                             |
| $\nu'_{53}$ | 3183 | 3059 | "                                                                                                           |
| $\nu'_{54}$ | 3189 | 3065 | "                                                                                                           |
| $\nu'_{55}$ | 3207 | 3082 | "                                                                                                           |
| $\nu'_{56}$ | 3217 | 3092 | "                                                                                                           |
| $\nu'_{57}$ | 3221 | 3096 | "                                                                                                           |

| <b>Non-totally symmetric (A'') modes: S<sub>0</sub> (DFT B3LYP / 6-31G **)</b> |                                                 |                                                                             |                                                                                                                                        |
|--------------------------------------------------------------------------------|-------------------------------------------------|-----------------------------------------------------------------------------|----------------------------------------------------------------------------------------------------------------------------------------|
| <b>Mode</b>                                                                    | <b><math>\nu''</math><br/>[cm<sup>-1</sup>]</b> | <b><math>\nu''_{\text{scaled}} = 0.9611\nu</math><br/>[cm<sup>-1</sup>]</b> | <b>Description<br/>(Out-of-plane motion dominated by ..... )</b>                                                                       |
| $\nu''_1$                                                                      | 85                                              | 82                                                                          | All atoms. Moderate CHO and OH motion.                                                                                                 |
| $\nu''_2$                                                                      | 119                                             | 114                                                                         | All atoms. Moderate CHO and OH motion.                                                                                                 |
| $\nu''_3$                                                                      | 203                                             | 195                                                                         | All atoms. Moderate CHO and OH motion.                                                                                                 |
| $\nu''_4$                                                                      | 233                                             | 224                                                                         | All atoms; Strong H <sub>20</sub> and C <sub>19</sub> motion (aldehyde group)                                                          |
| $\nu''_6$                                                                      | 331                                             | 318                                                                         | All atoms. Moderate CHO and OH motion.                                                                                                 |
| $\nu''_8$                                                                      | 414                                             | 398                                                                         | All H and C atoms. Small CHO and OH motion.                                                                                            |
| $\nu''_{12}$                                                                   | 507                                             | 487                                                                         | All H and C atoms. Small CHO and OH motion.                                                                                            |
| $\nu''_{14}$                                                                   | 551                                             | 530                                                                         | Some H and C atoms. (Not CHO or OH)                                                                                                    |
| $\nu''_{16}$                                                                   | 686                                             | 659                                                                         | All H and C atoms. Small CHO and OH motion.                                                                                            |
| $\nu''_{18}$                                                                   | 763                                             | 733                                                                         | Hydrogens (H <sub>7</sub> , H <sub>8</sub> , H <sub>11</sub> , H <sub>12</sub> , H <sub>15</sub> , H <sub>16</sub> )                   |
| $\nu''_{19}$                                                                   | 775                                             | 745                                                                         | All H and C atoms. (Not CHO or OH)                                                                                                     |
| $\nu''_{21}$                                                                   | 843                                             | 810                                                                         | Hydrogens (H <sub>7</sub> , H <sub>8</sub> , H <sub>11</sub> , H <sub>12</sub> , H <sub>15</sub> , H <sub>16</sub> )                   |
| $\nu''_{23}$                                                                   | 877                                             | 843                                                                         | Hydrogens (H <sub>7</sub> , H <sub>8</sub> , H <sub>11</sub> , H <sub>12</sub> ); Small H <sub>18</sub> motion.                        |
| $\nu''_{24}$                                                                   | 920                                             | 884                                                                         | H <sub>18</sub> (hydroxyl group)                                                                                                       |
| $\nu''_{25}$                                                                   | 952                                             | 915                                                                         | Hydrogens (H <sub>7</sub> , H <sub>8</sub> , H <sub>11</sub> , H <sub>12</sub> , H <sub>15</sub> , H <sub>16</sub> )                   |
| $\nu''_{26}$                                                                   | 985                                             | 947                                                                         | Hydrogens (H <sub>7</sub> , H <sub>8</sub> , H <sub>11</sub> , H <sub>12</sub> , H <sub>15</sub> , H <sub>16</sub> )                   |
| $\nu''_{28}$                                                                   | 992                                             | 953                                                                         | Hydrogens (H <sub>7</sub> , H <sub>8</sub> , H <sub>11</sub> , H <sub>12</sub> , H <sub>15</sub> , H <sub>16</sub> , H <sub>20</sub> ) |
| $\nu''_{29}$                                                                   | 1008                                            | 969                                                                         | H <sub>20</sub> and C <sub>19</sub> (i.e. CH of aldehyde group)                                                                        |

### S3. Molecular Orbitals of 2H1N

The  $S_1 \leftarrow S_0$  electronic transition of 2H1N comprises components of two molecular orbital (MO) transitions. It is predominantly composed of the MO 45  $\rightarrow$  MO 46 transition and also contains some MO 44  $\rightarrow$  MO 48 character. The Gaussian 03 representation of the DFT B3LYP/6-31G\*\* calculation of these orbitals is shown in Fig. S2. Changes in the acidity and basicity of functional groups connected by an IMHB may drive a proton transfer process.<sup>21,31,32,55</sup> Referring to Fig. S2, acidity-basicity changes can be seen to occur in 2H1N upon excitation. A slight decrease in electron density in the region of the hydroxyl oxygen occurs for the MO 45  $\rightarrow$  MO 46 transition, indicating an increase in acidity of the hydroxyl oxygen. In addition the shrinkage of this bonding orbital indicates a weakening of the O<sub>17</sub> – H<sub>18</sub> bond upon excitation. Electron density surrounding the carbonyl oxygen remains virtually unchanged during the MO 45  $\rightarrow$  MO 46 transition. The MO 44  $\rightarrow$  MO 48 transition is accompanied by an increased concentration of the electron density centred on the carbonyl oxygen, indicating an increased basicity in this region.

In Part 1<sup>13</sup> it was noted that the changes in acidity and basicity of the aldehyde and hydroxyl groups of 1H2N, which occur upon excitation, are quite modest in comparison to those of some other known proton transfer molecules, e.g. MHN23.<sup>14</sup> Referring to Fig. S2, it can be seen that the alterations in acidity and basicity of 2H1N which occur upon excitation are similarly modest in comparison to MHN23.

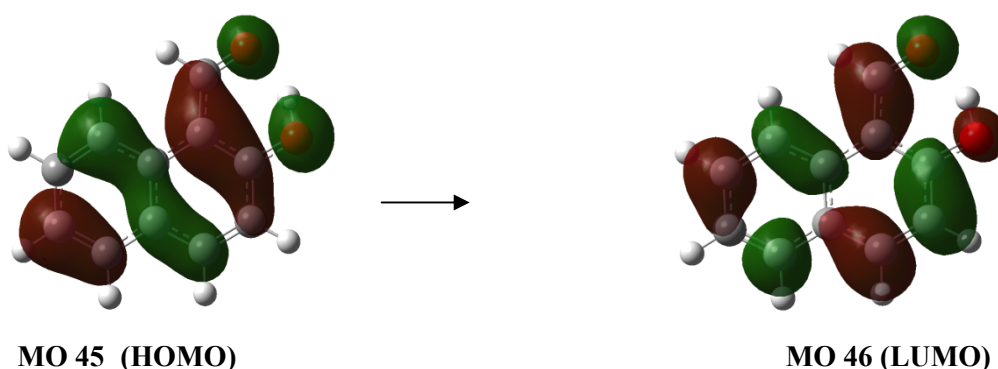

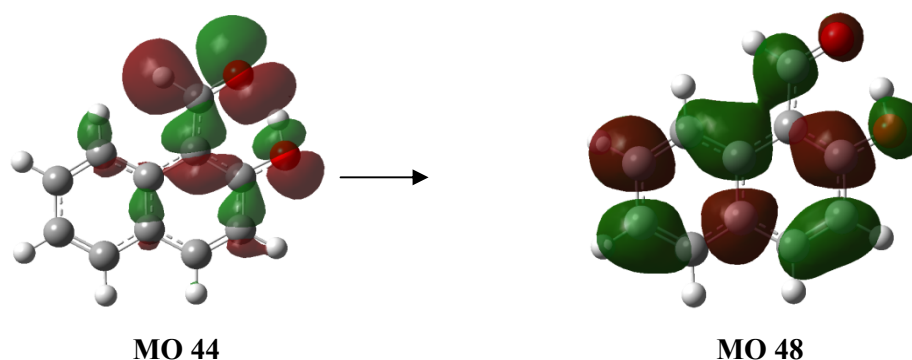

**Figure S2:** Molecular orbitals involved in the  $S_1 \leftarrow S_0$  electronic transition of 2H1N.

#### **S4. Excited Singlet States**

The CIS 6-31G+ energies and oscillator strengths of the first four singlets of 2H1N were computed. In Table S3 the calculated values are compared with the absorption maxima of the solution spectrum of 2H1N in methyl cyclohexane.<sup>22</sup> The absolute error in the CIS calculation of the singlet energies is large ( $\sim 10000 \text{ cm}^{-1}$ ). However, as with 1H2N<sup>13</sup> the CIS singlet energies appear to bear a qualitative resemblance to the experimentally measured absorption maxima.

The energy difference between the two experimentally measured absorption maxima is  $3592 \text{ cm}^{-1}$ . This appears to correlate with the theoretically calculated energy difference between  $S_1$  and  $S_3$  ( $4527 \text{ cm}^{-1}$ ) and the experimental maximum at  $31447 \text{ cm}^{-1}$  is tentatively assigned as  $S_3$ .

The second singlet  $S_2$  is computed to lie close in energy to  $S_1$  ( $2783 \text{ cm}^{-1}$ ) and has a very low oscillator strength ( $f \sim 0.0004$ ). Hence, the  $S_2$  singlet is likely to be obscured by the  $S_1$  singlet in solution. The low oscillator strength of  $S_2$  implies that it is likely to exhibit A" symmetry and is virtually impossible to observe.

**Table S3:** Gaussian calculation of singlet energies and oscillator strengths of 2H1N and the measured absorption maxima of 2H1N in cyclohexane solution.<sup>22</sup>

|                   | CIS 6-31G +                |                         | Experimental <sup>22</sup>   |                                                                       |
|-------------------|----------------------------|-------------------------|------------------------------|-----------------------------------------------------------------------|
|                   | Energy [cm <sup>-1</sup> ] | Osc. Strength, <i>f</i> | Abs max. [cm <sup>-1</sup> ] | Molar Ext. Coeff. ( $\epsilon$ ), [M <sup>-1</sup> cm <sup>-1</sup> ] |
| S <sub>1</sub>    | 36006                      | 0.2808                  | 27855                        | 8000                                                                  |
| S <sub>2</sub>    | 38790                      | 0.0004                  |                              |                                                                       |
| S <sub>3</sub>    | 40534                      | 0.1573                  | 31447                        | 12000                                                                 |
| S <sub>4</sub>    | 45733                      | 0.0449                  |                              |                                                                       |
| $\Delta S_1..S_2$ | 2783                       |                         |                              |                                                                       |
| $\Delta S_1..S_3$ | 4527                       |                         | 3592                         |                                                                       |
| $\Delta S_1..S_4$ | 9727                       |                         |                              |                                                                       |

### S5. Excited state geometry

The energies of the first four excited singlet states of 2H1N were calculated at CIS 6-31G+ level (see Table S3). Starting from the optimised ground state B3LYP 6-31G\*\* geometry, a geometry optimisation and frequency calculation on S<sub>1</sub> of 2H1N was performed using the CI singles method (CIS) and the 6-31G basis set (geometry optimizations at the CIS 6-31G\*\* and CIS 6-31G+ levels could not be performed due to computational limitations). The computed vibrational frequencies contained one imaginary frequency (indicated by a negative value) with an energy of (hc)×-66 cm<sup>-1</sup>. The presence of one imaginary frequency indicates that the computed structure of S<sub>1</sub> is a first order saddle point, i.e. an energy maximum in one direction on the potential surface and an energy minimum in all other directions.<sup>33</sup> The computed structure is therefore not the lowest energy S<sub>1</sub> geometry but rather a ‘transition’ structure between two other S<sub>1</sub> energy minima.<sup>#</sup> The nature of the imaginary frequency of a first order saddle point can assist in determining the normal co-ordinate for which the saddle point is an energy maximum. Locating this normal co-ordinate indicates the geometry perturbation required to produce the true energy minima, on the potential surface. The -66 cm<sup>-1</sup> vibration is an out-of-plane molecular vibration, which suggests that the computed

<sup>#</sup> A CIS 6-31G calculation was also carried out using the B3LYP 6-31G optimised ground state co-ordinates. However, this also produced a first order saddle point with the imaginary frequency - 66 cm<sup>-1</sup>. Unsuccessful attempts were also made to locate the fully optimised excited state structure from a perturbed ground state structure. It may be possible to locate the fully optimised geometry of S<sub>1</sub> (i.e. the global energy minimum) by performing a full or partial potential energy surface scan. Alternatively, a TDDFT calculation of the excited S<sub>1</sub> state or a CIS calculation with a larger basis set may assist in locating the global minimum. These computationally costly calculations were not performed.

'transition' structure links two out-of-plane geometries which are energy minima on the  $S_1$  potential energy surface. It is likely that one of these structures is the global minimum on the  $S_1$  potential energy surface. It was hence concluded, that the  $S_1$  geometry is likely to be an out-of-plane geometry. In contrast, the B3LYP 6-31G  $S_0$  geometry was found to be exactly planar and the B3LYP 6-31G\*\*  $S_0$  geometry approximately planar.

### S6. Gaussian fit of rovibronic envelopes in the $S_1 \leftarrow S_0$ fluorescence excitation spectrum of 2H1N

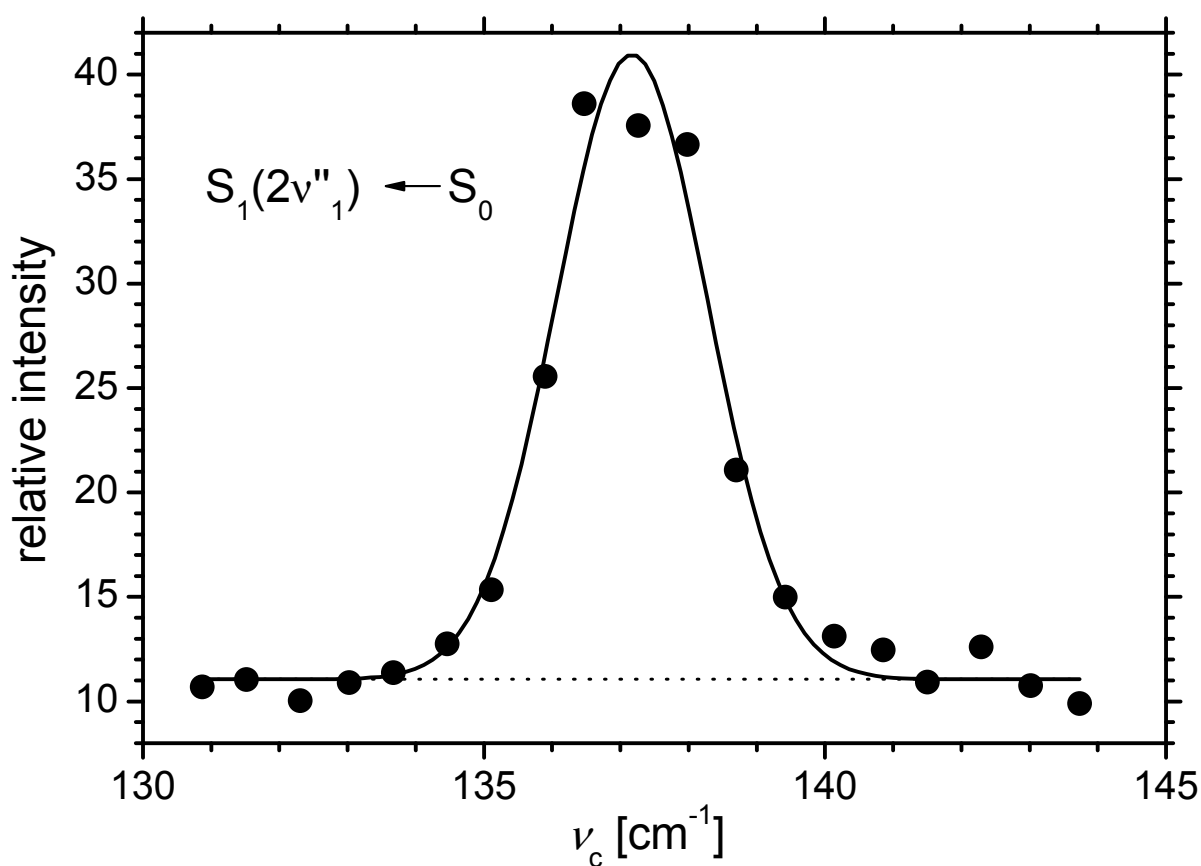

**Figure S3:** Gaussian fit to rovibronic envelope of line  $S_1(2v''_1)$  of 2H1N. (●) Experimental points; (—) Gaussian Fit; (- - -) Baseline ( $I_0$ ). Parameters:  $\nu_c = 137.17 \text{ cm}^{-1}$ ,  $I_0 = 11.1$  (arb. units),  $A = 83$  (arb. units),  $\Delta\nu = 3.1 \text{ cm}^{-1}$ ,  $R^2 = 0.973$ .

**Table S4:** Parameter list of Gaussian profiles

$$I(\nu) = I_0 + \frac{A}{w\sqrt{\pi}/2} \exp\left(-2\frac{(\nu - \nu_c)^2}{w^2}\right)$$

fitted to six vibronic lines of 2H1N.  $A$  is the area under the envelope,  $I_0$  is the baseline,  $\nu_c$  is the centre wavenumber, and  $\Delta\nu = w (\ln 4)^{-0.5}$  is the full width at half maximum. The errors of  $\Delta\nu$ ,  $I_0$ ,  $\nu_c$  and  $A$  are the standard errors calculated in the fitting procedure. The error of the average  $\Delta\nu$  value, is the standard deviation of the  $\Delta\nu$  values.

| Excess Energy, $\nu_c$ [ $\text{cm}^{-1}$ ]                          | assign.                         | $\Delta\nu$ [ $\text{cm}^{-1}$ ] | $I_0$ [arb. units] | $A$ [arb. units] | $R^2$         |
|----------------------------------------------------------------------|---------------------------------|----------------------------------|--------------------|------------------|---------------|
| $137.17 \pm 0.05$                                                    | $2\nu''_1$                      | $3.1 \pm 0.1$                    | $11.1 \pm 0.5$     | $83 \pm 4$       | 0.973         |
| $156.50 \pm 0.09$                                                    | $\nu''_3$                       | $3.4 \pm 0.2$                    | $10.9 \pm 0.3$     | $41 \pm 3$       | 0.935         |
| $245.80 \pm 0.08$                                                    | $\nu'_5$                        | $3.3 \pm 0.2$                    | $12.0 \pm 1.0$     | $101 \pm 9$      | 0.942         |
| $357.67 \pm 0.06$                                                    | $\nu''_2 + \nu''_4$             | $2.2 \pm 0.2$                    | $14.4 \pm 0.4$     | $28 \pm 3$       | 0.954         |
| $487.69 \pm 0.08$                                                    | $\nu'_{11}$                     | $2.5 \pm 0.2$                    | $15.4 \pm 0.8$     | $39 \pm 5$       | 0.927         |
| $752.24 \pm 0.07$                                                    | $\nu'_{20}$                     | $2.8 \pm 0.2$                    | $11.9 \pm 0.3$     | $35 \pm 3$       | 0.942         |
| <b>Average <math>\Delta\nu</math> [<math>\text{cm}^{-1}</math>]:</b> | <b><math>2.9 \pm 0.5</math></b> |                                  |                    |                  |               |
| <b>Average <math>R^2</math>:</b>                                     |                                 |                                  |                    |                  | <b>0.9455</b> |

**S7. Temperature and pressure dependence of line intensity ratios in the  $S_1 \leftarrow S_0$  fluorescence excitation spectrum of 2H1N**

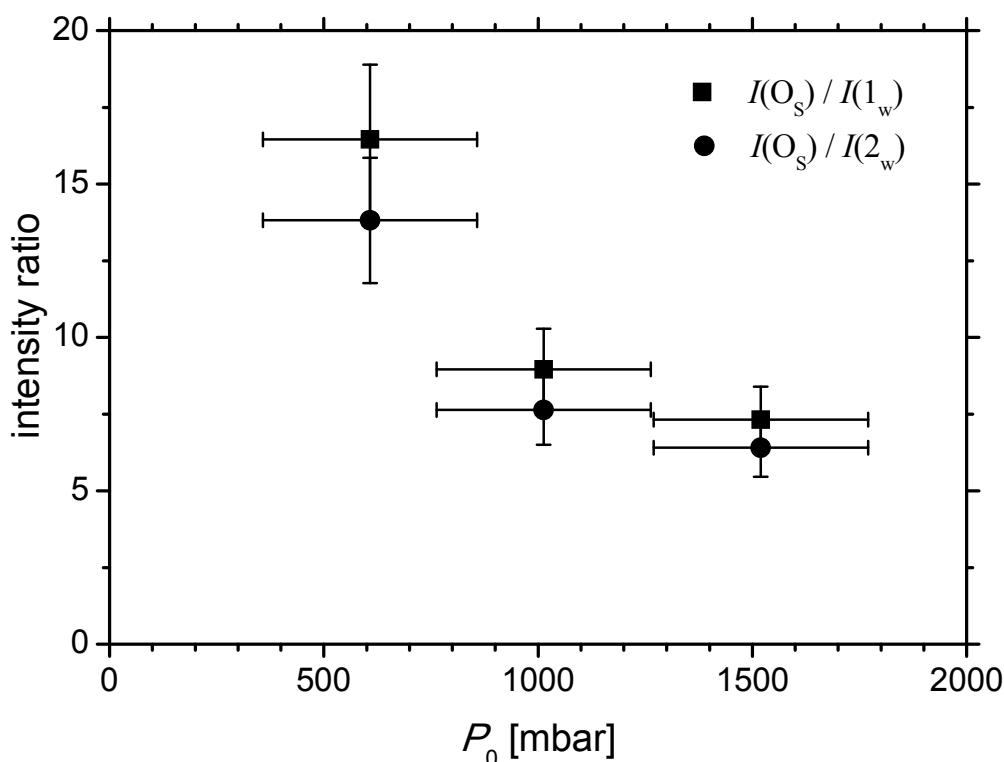

**Figure S4:**  $[I(O_s)/I(1_w)]$  (■) and  $[I(O_s)/I(2_w)]$  (●) as a function of backing pressure,  $P_0$ .  $I(O_s)$ ,  $I(1_w)$  and  $I(2_w)$  are the intensities of the 'strong' origin at  $26668 \text{ cm}^{-1}$ , the line  $1_w$  at  $26578 \text{ cm}^{-1}$  and the line  $2_w$  at  $26616 \text{ cm}^{-1}$ , respectively. The errors in average intensity ratios is based on the standard deviation of the measured relative intensities. The estimated error in measured pressure values is  $\pm 250$  mbar.



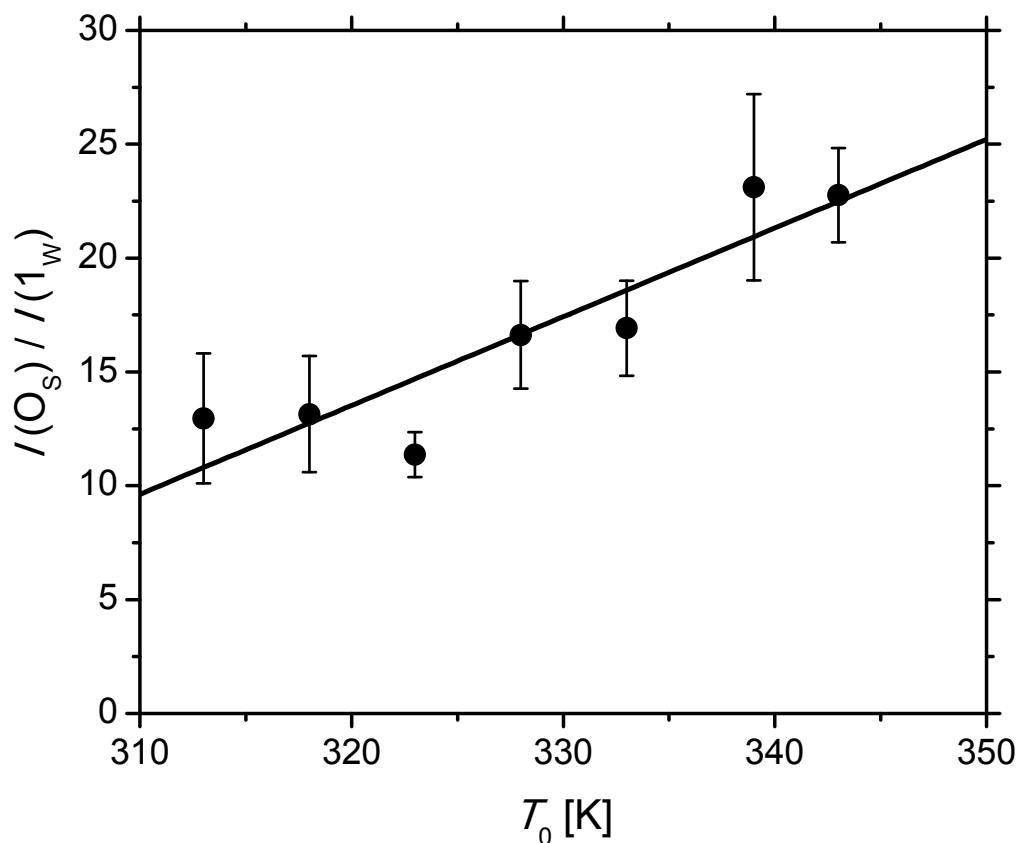

**Figure S5:** Plot of the ratio  $[I(O_s)/I(1_w)]$  versus the temperature of the reservoir gas mixture,  $T_0$ .  $I(O_s)$  and  $I(1_w)$  are the intensities of the strong origin line,  $O_s$  ( $26668\text{ cm}^{-1}$ ) and the feature  $1_w$  ( $26578\text{ cm}^{-1}$ ), respectively. The errors in the average relative intensities equate to the standard deviation of the measured relative intensities. The error in measured temperature values derives primarily from the positioning of the thermocouple with respect to the gas reservoir. This error is expected to be approximately uniform for the measured temperature range and is thus neglected here. The parameters of the linear regression ( $[I(O_s)/I(1_w)] = A + BT$ ) are:  $A = -110 \pm 30$ ,  $B = (0.39 \pm 0.08)\text{ K}^{-1}$ ,  $R^2 = 0.787$ .

## References

13. A. McCarthy and A. A. Ruth, *Phys. Chem. Chem. Phys.*, **2011**, 13, 7485–7499 (part1).
14. A. McCarthy and A. A. Ruth, *Phys. Chem. Chem. Phys.*, **2011** (part 3), to be submitted.
22. P. Chowdhury, S. Panja and S. Chakravorti, *J. Phys. Chem. A*, **2003**, 107, 83–90.
30. R. B. Singh, S. Mahanta, S. Kar and N. Guchhait, *Chem. Phys.*, 2007, **331**, 373–384.
33. J. B. Foresman and A. Frisch, in *Exploring Chemistry with Electronic Structure Methods*, Gaussian, Inc., 2nd edn., 1996, p. 213.
53. S. Tobita, M. Yamamoto, N. Kurahayashi, R. Tsukagoshi, Y. Nakamura and H. Shizuka, *J. Phys. Chem. A*, 1998, **102**, 5206–5214.
54. K. Irikura, R. Johnson and R. Kacker, *J. Phys. Chem A*, **2005**, 109, 8430–8437
55. J Catalan, *Journ. Of Amer. Chem. Soc.*, 2001, 123, 11940–11944.
